# Supplementary material for: Activity‐based proteomics uncovers suppressed hydrolases and a neo‐functionalised antibacterial enzyme at the plant–pathogen interface
Source: PubMed Central journal article supplement (PMC10952330; doi:10.1111/nph.18857), 2023-03-29
Supplement: NPH-241-394-s005.pdf [file NPH-241-394-s005.pdf]

## New Phytologist Supporting Information

*Title: Activity-based proteomics uncovers suppressed hydrolases and a neo-functionalised antibacterial enzyme at the plant-pathogen interface.*

Authors: Daniela J. Sueldo, Alice Godson, Farnusch Kaschani, Daniel Krahn, Till Kessenbrock, Pierre Buscaill, Christopher J. Schofield, Markus Kaiser and Renier A. L. van der Hoorn.

Article acceptance date: 16.2.2023

**Table S1** Used oligonucleotides.

| Name       | Purpose                                       | Sequence (5' to 3')                                  |
|------------|-----------------------------------------------|------------------------------------------------------|
| PR3_F      | Clone <i>NbPR3</i> from cDNA                  | tggtggtctcaaATGGAGTTTTCTGGATCACCCTGG                 |
| PR3_R      | Clone <i>NbPR3</i> from cDNA                  | ttcgtggtctcaaagcCTAGCCCTGGGCGAAGTTCCTT               |
| RD21_F     | Clone <i>NbRD21</i> from cDNA                 | tggtggtctcaaATGGCAAATCATAGCTCCACTCTCA                |
| RD21_R     | Clone <i>NbRD21</i> from cDNA                 | ttcgtggtctcaaagcTCAAGAACTGCTCTCCGTCCT                |
| SBT1.7a_F1 | Clone <i>NbSBT1.7a</i> from cDNA, remove BsaI | tggtggtctcaaATGTCTAGATACCCAGTAATACTTG                |
| SBT1.7a_R1 | Clone <i>NbSBT1.7a</i> from cDNA, remove BsaI | ttcgtggtctcaACCCTTCTCCATAGCAGCAA                     |
| SBT1.7a_F2 | Clone <i>NbSBT1.7a</i> from cDNA, remove BsaI | tggtggtctcaGGGTATTTTGGTGTCTTGTTTCAGC                 |
| SBT1.7a_R2 | Clone <i>NbSBT1.7a</i> from cDNA, remove BsaI | ttcgtggtctcaaagcTCATGTCCAAGAAATTGCCACAG              |
| SCPL20_F   | Clone <i>NbSCPL20</i> from cDNA               | tggtggtctcaaATGGCAAGAATAAATGC                        |
| SCPL20_R   | Clone <i>NbSCPL20</i> from cDNA               | ttcgtggtctcaaagcTCATATGTTCTTGCCCTC                   |
| SCPL48_F   | Clone <i>NbSCPL48</i> from cDNA               | tggtggtctcaaATGGCTTCTTCTTTCTCTC                      |
| SCPL48_R   | Clone <i>NbSCPL48</i> from cDNA               | ttcgtggtctcaaagcCTAGGACAATTTGCCTTG                   |
| E92A_F     | Mutate E92A in <i>NbPR3</i> by SDM            | cttctcatcaactactggtggtccctgagtcagaacc                |
| E92A_R     | Mutate E92A in <i>NbPR3</i> by SDM            | ccaccagtagttgcatgagaagttgaccgaaaaggcagc              |
| Q112E_F    | Mutate Q112E in <i>NbPR3</i> by SDM           | gctttgtcgggaaaatgaccagagtgaaagatattatggttagaggacctcc |
| Q112E_R    | Mutate Q112E in <i>NbPR3</i> by SDM           | cactctggtcattttcccgaacaaagcaatatcctctgtaaatggttctgc  |

**Table S2** Used plasmids.

| <b>Name</b> | <b>Description</b>                 | <b>Reference</b>                   |
|-------------|------------------------------------|------------------------------------|
| pICH51288   | pL0M-PU-35S-TMV-3-5128835S         | Engler <i>et al.</i> , 2014        |
| pICH41414   | pL0M-T-35S-1-4141435S              | Engler <i>et al.</i> , 2014        |
| P19         | Binary 35S::P19                    | Van der Hoorn <i>et al.</i> , 2003 |
| pJK001c     | Binary empty vector (EV)           | Paulus <i>et al.</i> , 2020        |
| pAG001      | Binary 35S::NbPR3                  | This work                          |
| pPB034      | Binary 35S::NbRD21                 | This work                          |
| pAG003      | Binary 35S::NbSBT1.7a              | This work                          |
| pAG004      | Binary 35S::NbSCPL20               | This work                          |
| pAG005      | Binary 35S::NbSCPL48               | This work                          |
| pAG006      | Binary 35S::NbPR3 <sup>E92A</sup>  | This work                          |
| pAG007      | Binary 35S::NbPR3 <sup>Q112E</sup> | This work                          |

**Table S4** protein concentrations in AF.

| <b>Protein concentration (mg/mL)</b> |                              | <b>Ratio</b>                      |
|--------------------------------------|------------------------------|-----------------------------------|
| <b>Mock</b>                          | <b><math>\Delta</math>hQ</b> | <b>(<math>\Delta</math>hQ/WT)</b> |
| 0.136                                | 0.864                        | 6.35                              |
| 0.078                                | 0.921                        | 11.8                              |
| 0.042                                | 0.783                        | 18.6                              |
| 0.058                                | 1.148                        | 19.8                              |
