# Supplementary material for: Activity‐based proteomics uncovers suppressed hydrolases and a neo‐functionalised antibacterial enzyme at the plant–pathogen interface
Source: PubMed Central journal article supplement (PMC10952330; doi:10.1111/nph.18857), 2023-03-29
Supplement: NPH-241-394-s006.pdf [file NPH-241-394-s006.pdf]

## New Phytologist Supporting Information

*Title: Activity-based proteomics uncovers suppressed hydrolases and a neo-functionalised antibacterial enzyme at the plant-pathogen interface.*

Authors: Daniela J. Sueldo, Alice Godson, Farnusch Kaschani, Daniel Krahn, Till Kessenbrock, Pierre Buscaill, Christopher J. Schofield, Markus Kaiser and Renier A. L. van der Hoorn.

Article acceptance date: 16.2.2023.

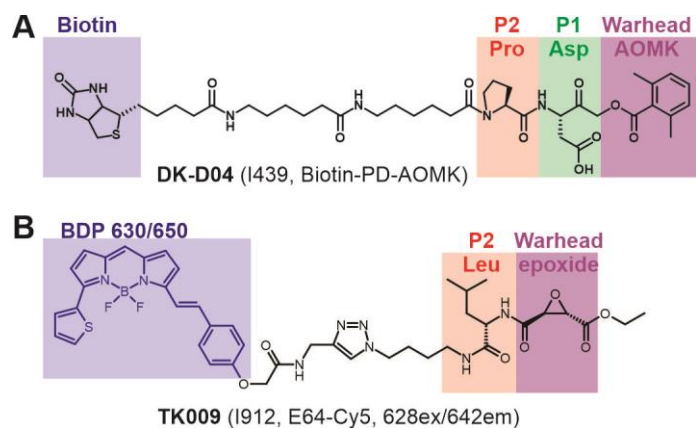

**Figure S1** Structure of additional activity-based probes.

(A) Structure of DK-D04 (Biotin-PD-AOMK), a probe for biotinylation of VPEs.

(B) Structure of TK009 (Cy5-E64), a probe for fluorescent labelling of PLCPs.

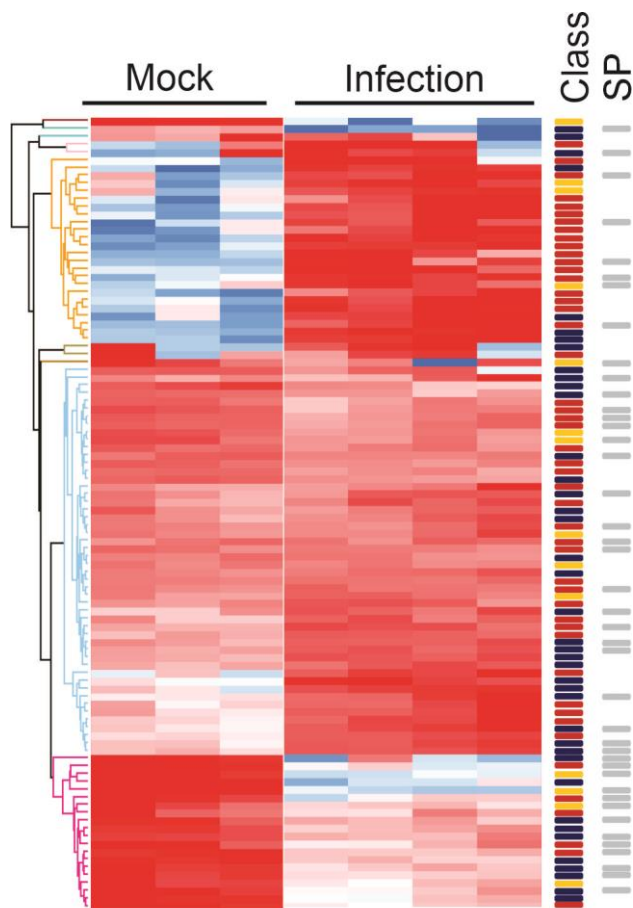

**Figure S2.** Replicate activity-based proteomics experiment.

Heatmap of 105 active hydrolases detected by activity-based proteomics (experiment ACE136), grouped by category (left) and are annotated as SH(red) / GH(blue) / CP(yellow); hydrolases with a SignalP-predicted signal peptide are marked in grey (right). *N. benthamiana* plants were infected with *Pto*DC3000( $\Delta hQ$ ) or water (mock); apoplastic fluid was collected at 2 days post infection (2dpi). Apoplastic fluid was labelled for active serine hydrolases (SHs), glycosyl hydrolases (GHs) and cysteine proteases (CPs) followed by affinity purification of the labelled proteins and MS analysis.

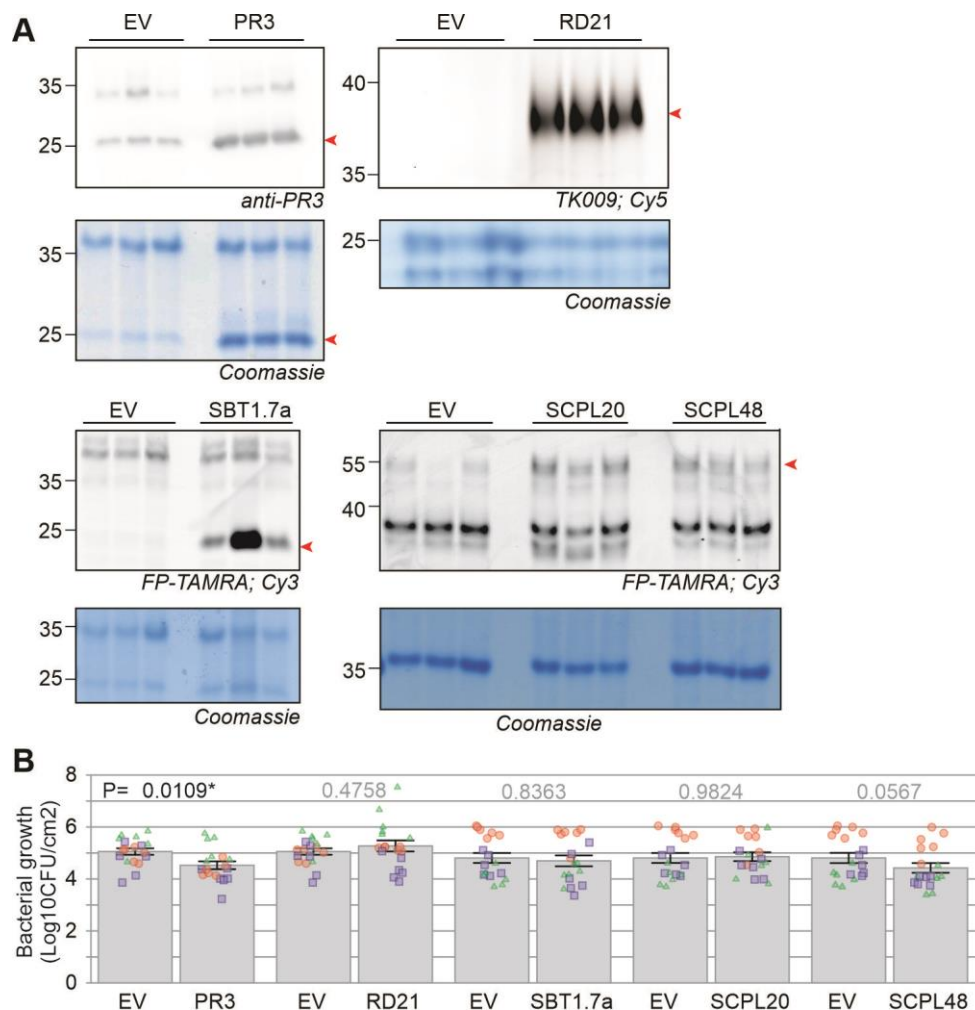

**Figure S3** Transient hydrolase expression and agromonas assays.

(A) Confirmation of hydrolase expression. Hydrolase genes were transiently overexpressed by agroinfiltration of *N. benthamiana*. AF was isolated in triplicate at day-4 and labelled with fluorescent probes selective for papain-like proteases (TK009) or Ser hydrolases (FP-TAMRA). Labelled samples were separated on protein gels, which were scanned for fluorescence and stained with Coomassie Blue. *NbPR3* accumulation was detected with an anti-PR3 antibody and detected by Coomassie Blue staining.

(B) *NbPR3* reduces bacterial growth. Hydrolases were transiently overexpressed by agroinfiltrations. At day 2, agroinfiltrated leaves were infiltrated with  $10^6$  CFU/ml *PtoDC3000*( $\Delta hQ$ ). At day 5, leaf extracts were generated, diluted and spotted on plates containing CFC antibiotics to select for *P. syringae*. Bacterial growth is shown in Log<sub>10</sub>CFU/cm<sup>2</sup>. Bars show the mean value of 18 biological replicates performed over three separate experiments, and error intervals represent the standard error. P-values were calculated by two-way ANOVA followed by post-hoc comparison using the Dunnett test to examine the effect of hydrolase overexpression on bacterial growth.

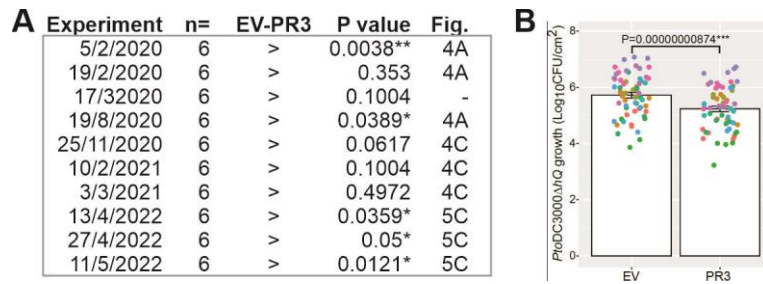

**Figure S4** Ten replicate infection assays show increased resistance upon *NbPR3* expression.

**(A)** Ten experimental replicates, each having n=6 biological replicates. Bacterial growth on *NbPR3* expressing leaves was always lower (>) than the EV control, and statistically significant for 5 of the 10 experiments. **(B)** All (6x10=) 60 datapoints of the ten experiments summarised in one figure. The p-value was calculated by a 2-way ANOVA, using the experimental data as a block.

*NbPR3* and the empty vector (EV) control were transiently expressed by agroinfiltration. Two days later the same leaf was infiltrated with  $10^6$  CFU/ml bacteria and bacterial population densities were determined three days later, expressed  $\text{Log}_{10}\text{CFU}/\text{cm}^2$ .

```

NbPR3 27 IGSIVTSDLFNEMLKNRNDVRCPANGFYTYDAFIAAANSFPGFGTTGDDTARRKEIAAFF 86
CHN-A 80 LGSILSSSMFDQMLKHRNDNACQKGFYSYNAFINAARSFPGFGTSGDITARKREIAAFF 139

NbPR3 87 GQTSHE TTGGSLSAE--PFTGGYCFVRQNDQ-----SERYYGRGPIQLTN 129
CHN-A 140 AQTSHET TGGWATAPDCPYAWGYCWLREQSGPGDYCTPSGQWPCAPGRKYFGRGPIQISH 199

NbPR3 130 RNNYEKAGTAIQDDLNNPDLVATDATISFKTAIWFWMTAQDNKPSSHDVIIGSWTPSAA 189
CHN-A 200 NYNYGPCGRAIGVDLLNNPDLVATDPVISFKSALWFWMTFQSPKPSCHDVIIGRWQPSAC 259

NbPR3 190 DQAANRVPGYGVITNIIINGGIECGMGRNDAVEDRIGYRRCGMLNVAPGENLDCYNQRN 249
CHN-A 260 DRAANRIPGFGVITNIIINGGLECGRGTDSRVQDRIGFYRRCSTLGVSPGDNLDCGNQRS 319

NbPR3 250 FAQG 253
CHN-A 320 FNGG 323

```

**Figure S5** Protein sequence alignment of *NbPR3* and endochitinase CHN-A.

The mature *NbPR3* protein sequence was aligned with the class I endochitinase CHN-A from *N. tabacum*. Residues that differ from *NbPR3* (grey), key catalytic residues (red) and other residues relevant for chitinase activity (green) are highlighted.

|                  |     |                                                                |     |
|------------------|-----|----------------------------------------------------------------|-----|
| Nbenthamiana     | 1   | -----MEFSGSPLVLFFCC                                            | 13  |
| Ntabacum         | 1   | -----MEFSGSPMALFFCC                                            | 13  |
| Nattenuata       | 1   | -----MEFSGSPLALFFCC                                            | 13  |
| Nsylvestris      | 1   | -----MEFSGSPMALFFCC                                            | 13  |
| Ntomentosiformis | 1   | -----MEFSGSPLTLFFCC                                            | 13  |
| Pepper           | 1   | -----MKFLSSPLAL-TC                                             | 12  |
| Potato           | 1   | -----MEFLGSQMVLC                                               | 12  |
| Tomato           | 1   | -----MVLCC                                                     | 5   |
| Arabidopsis      | 1   | MKTNLFLFLIFSLLLLSLSSAEQCGRQAGGALCPNGLCCSEFGWCGNTEPYCKQPGCQSQC  | 60  |
| Rice             | 1   | -----MTTTTTRFVQLAACAAAS                                        | 18  |
|                  |     |                                                                |     |
| Nbenthamiana     | 14  | VFFLFLTGSLAQGIGSIVTSDLFNEMLKNRNDVRCPANGFYTYDAFIAAANSFPGFGTTG   | 73  |
| Ntabacum         | 14  | VFFLFLTGSLAQGIGSIVTSDLFNEMLKNRNDGRCPANGFYTYDAFIAAANSFPGFGTTG   | 73  |
| Nattenuata       | 14  | VFFLFLTGSLAQGIGSIVTSDLFNEMLKNRNDGRCPANGFYTYDAFIAAANSFPGFGTTG   | 73  |
| Nsylvestris      | 14  | VFFLFLTGSLAQGIGSIVTSDLFNEMLKNRNDGRCPANGFYTYDAFIAAANSFPGFGTTG   | 73  |
| Ntomentosiformis | 14  | VFFLFLTGSLAQGIGSIVTNDLFNEMLKNRNDGRCPANGFYTYDAFIAAANSFPGFGTSG   | 73  |
| Pepper           | 12  | VFFLFLTGSLAQDVGSIIVTNDLFNMLKNRDDRCPAKGFYTYDAFIAAANSFPGFGTTG    | 71  |
| Potato           | 12  | VFWLFLTGSLAQDVGSIIVTSDLFNEMLKNRNDRCPAKGFYTYDAFIGAANSFSGFGTTG   | 71  |
| Tomato           | 6   | VFLFLTGSLAQDVGSIIVTSDLFNEMLKNRNDRCPAKGFYTYDAFIAAANSFPGFGTTG    | 65  |
| Arabidopsis      | 61  | TPGGTP-PGPTGDLSGIISSSQFDMLKHRNDACPARGFYTYNAFIITAAKSFPGFGTTG    | 119 |
| Rice             | 19  | LLAVAASGAAQGVGSVITQAVFNSMLPNRDNSSQCPARGFYTYDAFIAAANSFPAFGTSG   | 78  |
|                  |     |                                                                |     |
| Nbenthamiana     | 74  | DDT-ARRKEIAAFFGQTSHEETTGGSL-SA-EPFTGGYCFVRQNDQ-----            | 115 |
| Ntabacum         | 74  | DDT-ARRKEIAAFFGQTSHEETTGGSL-SA-EPFTGGYCFVRQNDQ-----            | 115 |
| Nattenuata       | 74  | DDT-ARRKEIAAFFGQTSHEETTGGSL-SA-EPFTGGYCFVRQNDQ-----            | 115 |
| Nsylvestris      | 74  | DDT-ARRKEIAAFFGQTSHEETTGGSL-SA-EPFTGGYCFVRQNDQ-----            | 115 |
| Ntomentosiformis | 74  | DDT-ARRKEIAAFFGQTSHEETTGGSL-SA-EPFTGGYCFVRQNDQ-----            | 115 |
| Pepper           | 72  | DDT-ARRKEIAAFFGQTSHEETTGGSL-SADGPFAGGYCFVREGNQ-----M           | 115 |
| Potato           | 72  | DDT-ARRKEIAAFFGQTSHEETTGGSL-SADGPFAGGYCFVREGNQ-----V           | 115 |
| Tomato           | 66  | DDT-ARRKEIAAFFGQTSHEETTGGSL-SADGPFAGGYCFVREGNQ-----M           | 109 |
| Arabidopsis      | 120 | DTA-TRKKEVAAFFGQTSHEETTGGWATAPDGPYSWGYCFKQEQNPASDYCEPSATWPCAS  | 178 |
| Rice             | 79  | GSAELIRRELAAFFGQTSHEETTGGTR-GSSDQFQWGYCFKEINKA-----T           | 124 |
|                  |     |                                                                |     |
| Nbenthamiana     | 116 | SERYYGRGPIQLTNRNNEYKAGTAIQDVLVNNPDLVATDATISFKTAIWFWMTAQDNKPS   | 175 |
| Ntabacum         | 116 | SERYYGRGPIQLTNRNNEYKAGTAIQDVLVNNPDLVATDATISFKTAIWFWMTPQDNKPS   | 175 |
| Nattenuata       | 116 | SERYYGRGPIQLTNRNNEYKAGTAIQDVLVNNPDLVATDATISFKTAIWFWMTPQDNKPS   | 175 |
| Nsylvestris      | 116 | SERYYGRGPIQLTNRNNEYKAGTAIQDVLVNNPDLVATDATISFKTAIWFWMTPQDNKPS   | 175 |
| Ntomentosiformis | 116 | SERYYGRGPIQLTNRNNEYKAGNAIRQDVLVNNPDLVATDATISFKTAIWFWMTPQDNKPS  | 175 |
| Pepper           | 116 | GSGFYGRGPIQLTGQSNYDLAQQAIGQDLVNNPDLVATDATVDFKTAIWFWMTPQGNKPS   | 175 |
| Potato           | 116 | GSGFYGRGPIQLTGQSNYDLAQQAIGQDLVNNPDLVATDATVDFKTAIWFWMTPQGNKPS   | 175 |
| Tomato           | 110 | GSGFYGRGPIQLTGQSNYDLAQQAIGQDLVNNPDLVATDATVDFKTAIWFWMTPQGNKPS   | 169 |
| Arabidopsis      | 179 | GKRYYGRGPIQLSWNNYNYGLCGRAIGVDLLNPNPDLVANDAVIAFKAAIWFWMTPQPPKPS | 238 |
| Rice             | 125 | SPPYYGRGPIQLTGQSNYQAAGNALGLDLVGNPDLVSTDAVVSFKTAIWFWMTPQGNKPS   | 184 |
|                  |     |                                                                |     |
| Nbenthamiana     | 176 | SHDVIIGRWTPSAADQAANRVPGYGVITNIINGGIECGMGRNDAVEDRIGYYRRCGMLN    | 235 |
| Ntabacum         | 176 | SHDVIIGRWTPSAADQAANRVPGYGVITNIINGGIECGIGRNDAVEDRIGYYRRCGMLN    | 235 |
| Nattenuata       | 176 | SHDVIIGRWTPSAADQSANRAPGYGVITNIINGGIECGIGRNDAVEDRIGYYRRCGMLN    | 235 |
| Nsylvestris      | 176 | SHDVIIGRWTPSAADQAANRVPGYGVITNIINGGIECGIGRNDAVEDRIGYYRRCGMLN    | 235 |
| Ntomentosiformis | 176 | SHDVIIGRWTPSAADQSANRAPGYGVITNIINGGIECGVGNDAVEDRIGYYRRCGMLN     | 235 |
| Pepper           | 176 | CHDVIIGRWTPSAADTSANRQPGYGVITNIINGGIECGKQGNPQVEDRIGFYRYCYTILN   | 235 |
| Potato           | 176 | CHDVIIGRWTPSAADTSANRQPGYGVITNIINGGIECGKQGNPQVEDRIGFYRYCYTILN   | 235 |
| Tomato           | 170 | CHDVIIGRWTPSAADASANRQPGYGVITNIINGGIECGKQGNPQVEDRIGFYRYCYTILN   | 229 |
| Arabidopsis      | 239 | CHAVIAGQWQPSDADRAAGRLPGYGVITNIINGGLECGRGQDGRVADRIGFYRYCYNIFG   | 298 |
| Rice             | 185 | CHDVIIGRWTPSAADTAAGRVPYGVITNIINGGIECGVGNDAVDRIGYKRYCDMLG       | 244 |
|                  |     |                                                                |     |
| Nbenthamiana     | 236 | VAPGENLDCYNQRNFAQG-----                                        | 253 |
| Ntabacum         | 236 | VAPGENLDCYNQRNFGQG-----                                        | 253 |
| Nattenuata       | 236 | VAPGENLDCYNQRNFGQG-----                                        | 253 |
| Nsylvestris      | 236 | VAPGENLDCYNQRNFGQG-----                                        | 253 |
| Ntomentosiformis | 236 | VAPGDNLDCYNQRNFAQG-----                                        | 253 |
| Pepper           | 236 | VAPGDNLDCYNQRNFAEA-----                                        | 253 |
| Potato           | 236 | VAPGDNLDCYTQRNFAEA-----                                        | 253 |
| Tomato           | 230 | VAPGDNLDCYDQRNFAEA-----                                        | 247 |
| Arabidopsis      | 299 | VNPGGNLDCYNQRSFVNGLLEAAI                                       | 322 |
| Rice             | 245 | AGYGSNLDCYNQRNFAS-----                                         | 261 |

**Figure S6** Protein alignment of putative *NbPR3* orthologs from diverse plant species.

ClustalO alignment of putative *NbPR3* orthologs from several *Nicotiana* species, pepper, potato, tomato, *Arabidopsis thaliana* and rice. Differences with *NbPR3* (grey), key catalytic residues (red) and other residues relevant for chitinase activity (green) are highlighted.

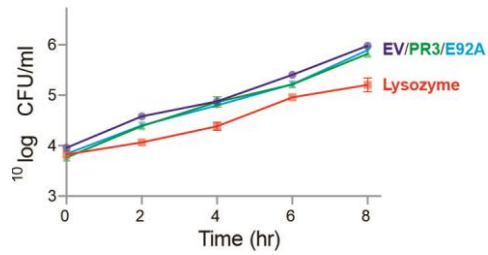

**Figure S7** *NbPR3* does not impact bacterial growth *in vitro*.

AF from agroinfiltrated plants expressing *NbPR3* or its E92A mutant or the empty vector (EV) control, with or without added lysozyme (1 mg/ml), was incubated with OD = 0.001 *PtoDC3000*. Samples were taken at various time points and colony forming units (CFU) was determined by plating out dilution series. Error bars represent standard error of n=3 replicates.

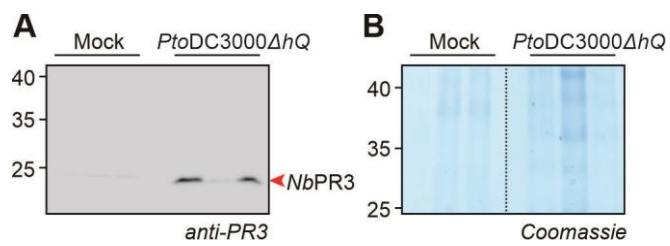

**Figure S8** *NbPR3* accumulates in the apoplast upon infection.

*N. benthamiana* leaves were infiltrated with water (mock) or *PtoDC3000(ΔhQ)* and AF was isolated from three biological replicates at 2dpi and equal volumes were analysed by western blot with the anti-PR3 antibody (**A**) and on gel, stained with Coomassie Blue (**B**).
